## Posters

### Scientific Presentation: Epid (Epidemiology)

157

#### PREVALENCE AND PATTERNS OF DRUG-DISEASE INTERACTIONS IN LONG-TERM RESIDENTS IN NURSING HOME FACILITIES IN THE CZECH REPUBLIC

A. Lukačšínová<sup>1</sup>, I. Kummer<sup>1</sup>, V. Přihodová<sup>1</sup>, D. K. Bandari<sup>1</sup>, J. Brkic<sup>1</sup>, D. Fialová<sup>1,2</sup>

<sup>1</sup>Department of Social and Clinical Pharmacy, Faculty of Pharmacy in Hradec Králové, Charles University in Prague, Czech Republic

<sup>2</sup>Department of Geriatrics and Gerontology, 1st Faculty of Medicine, Charles University in Prague, Czech Republic

**Introduction:** Prescription of potentially inappropriate medications, non-geriatric doses and drug-disease interactions contribute to high prevalence of adverse drug events, geriatric syndromes and symptoms, and increased frailty in older adults. Despite serious health and socio-economic consequences, a very few studies have been published on phenomenon of

prescribing of drug-disease interactions (DDI) in older patients in Central and Eastern Europe.

**Methods:** This study aimed to investigate the prevalence of DDI and differences across nursing home (NH) facilities applying relevant parts of Beers 2012 criteria, Czech national consensus 2012 (CNC), and STOPP/START criteria vers.1. This is a retrospective cross-sectional study that analysed semi-implicitly InterRAI-LTC assessment protocols of 490 NH residents from 10 Czech NH facilities (N = 490, 65+) participating in the EU SHELTER project. Retrospective analyses were conducted in 2019 year.

**Results:** Prevalence of potentially inappropriate DDI ranged from 44.5% to 62.3% identified by STOPP criteria and CNC, respectively. The most common DDIs were long-term use of benzodiazepines in depressive residents (7.8%) and use of opioids in residents with chronic constipation without osmotic laxative treatment (7.4%). The prevalence of undertreatment identified by START criteria was 52.9%, mainly due to absence of statins in NH residents with diabetes mellitus and cardiovascular risk factors (9.8%) and the absence of anticoagulation therapy in patients with atrial fibrillation (7.1%).

**Conclusions:** Potentially inappropriate DDI were highly prevalent in Czech long-term NH residents with significant differences across NH facilities. Using method of semi-implicit medication reviews, we cannot judge the real quality of drug treatment, but there is a necessity to reduce the high prevalence of DDI in NHs in order to prevent potential adverse drug events. Grant support: InoMed project (reg. No: CZ.02.1.01/0.0/0.0/18\_069/0010046, 2019–2022), H2020-MCSF-ITN-764632, PROGRESS Q42 FoP, Charles University, FP7-HEALTH-F4–2008-201,917, SVV 260417.
